# Supplementary material for: Palytoxin-Containing Aquarium Soft Corals as an Emerging Sanitary Problem
Source: PubMed Central journal article supplement (PMC4771986; doi:10.3390/md14020033), 2016-02-04
Supplement: marinedrugs-14-00033-s001.pdf [file marinedrugs-14-00033-s001.pdf]

# Supplementary Materials: Palytoxin-Containing Aquarium Soft Corals as an Emerging Sanitary Problem

Marco Pelin, Valentina Brovedani, Silvio Sosa and Aurelia Tubaro \*

Figure A1: Draft chart for palytoxin/s poisonings associated with soft corals

Date.....

Identification of the patient (first two letters of Name and Surname)

|                |      |                            |
|----------------|------|----------------------------|
| Date of birth: | Sex: | Date of onset of symptoms: |
|----------------|------|----------------------------|

## 1. Case Definition:

|                              |                                                                                                                                                                 |
|------------------------------|-----------------------------------------------------------------------------------------------------------------------------------------------------------------|
| <b>Inhalational exposure</b> | • soft coral eradication by boiling water and/or by brushing of the coral                                                                                       |
|                              | • cleaning of the aquarium using hot water                                                                                                                      |
|                              | • seeking medical care                                                                                                                                          |
|                              | • presence of at least two of the following signs/symptoms: cough, dyspnea, fever $\geq 38\text{ }^{\circ}\text{C}$ , tachycardia, leukocytosis, and chest pain |
| <b>Cutaneous exposure</b>    | • contact with aquarium water in presence of <i>Palythoa</i> and/or <i>Zoanthus</i> soft corals                                                                 |
|                              | • skin contact with <i>Palythoa</i> and/or <i>Zoanthus</i> soft corals                                                                                          |
|                              | • presence of at least two of the following signs/symptoms: erythema, edema, paresthesia, ECG alterations                                                       |
| <b>Ocular exposure</b>       | • eye contact with <i>Palythoa</i> and/or <i>Zoanthus</i> soft corals' secretions                                                                               |
|                              | • eye contact with hands after <i>Palythoa</i> and/or <i>Zoanthus</i> soft corals manipulation                                                                  |
|                              | • presence of at least two of the following signs/symptoms: ocular irritation, punctate epitheliopathy, photophobia, conjunctival hyperemia                     |

|                                       | Inhalational Exposure | Cutaneous Exposure | Ocular Exposure | Other |
|---------------------------------------|-----------------------|--------------------|-----------------|-------|
| Location of exposure                  |                       |                    |                 |       |
| Date of exposure                      |                       |                    |                 |       |
| Duration of exposure                  |                       |                    |                 |       |
| Latency btw onset of symptoms and exp |                       |                    |                 |       |

## 2. Signs and Symptoms

|                                         | YES | NO | YES | NO |
|-----------------------------------------|-----|----|-----|----|
| Fever $\geq 38\text{ }^{\circ}\text{C}$ |     |    |     |    |
| Cough                                   |     |    |     |    |
| Headache                                |     |    |     |    |
| Dyspnea                                 |     |    |     |    |
| Sore throat                             |     |    |     |    |
| Rhynorrhea                              |     |    |     |    |
| Chest pain                              |     |    |     |    |
| Tachycardia                             |     |    |     |    |
|                                         |     |    |     |    |
|                                         |     |    |     |    |
|                                         |     |    |     |    |
|                                         |     |    |     |    |
|                                         |     |    |     |    |
|                                         |     |    |     |    |
|                                         |     |    |     |    |
|                                         |     |    |     |    |

Pre-Existent Pathologies and Medical Conditions:

|                                            |                              |
|--------------------------------------------|------------------------------|
| Asthma and other chronic pulmonary disease | Dermatitis                   |
| Rhinitis                                   | Ocular pathologies (specify) |
| Seasonal allergies                         | Contact lenses               |
| Influenza                                  | Other (specify)              |
| Cardiovascular diseases (specify)          |                              |

Drugs used at the moment of the exposure or before

**3. Diagnostic Examinations**

| Blood              | YES (Indicate Values and Lab-Range) | NO |
|--------------------|-------------------------------------|----|
| Blood Count        |                                     |    |
| Leukocyte count    |                                     |    |
| CPK                |                                     |    |
| LDH                |                                     |    |
| AST                |                                     |    |
| ALT                |                                     |    |
| C-reactive protein |                                     |    |
| Na <sup>+</sup>    |                                     |    |
| K <sup>+</sup>     |                                     |    |
| .....              |                                     |    |
| .....              |                                     |    |
| URINE              | YES (Indicate Values and Lab-Range) | NO |
| Color              |                                     |    |
| Myoglobinuria      |                                     |    |
| K <sup>+</sup>     |                                     |    |
| .....              |                                     |    |
| .....              |                                     |    |
| Other              | YES (Indicate Observations)         | NO |
| ECG                |                                     |    |
| Chest X-rays       |                                     |    |
| .....              |                                     |    |
| .....              |                                     |    |

**4. Therapy**

.....  
 .....  
 .....

**5. ACCESS to Emergency Department**      NO      YES

**Hospitalization**      NO      YES

Day of admission: .....

Day of discharge: .....

Time after exposure: .....      Time of recovery: .....

**6. Laboratory Analysis for Pltx/s Identification**

Raw material for analysis: .....

If possible, please specify the soft coral species.....

|                                | Soft coral | Aquarium water | Other * |
|--------------------------------|------------|----------------|---------|
| HPLC analysis                  |            |                |         |
| LC/MS analysis                 |            |                |         |
| Hemolysis neutralization assay |            |                |         |
| ELISA method                   |            |                |         |
| .....                          |            |                |         |

\* Please specify.....

**7. Notes**

|                         |
|-------------------------|
| .....<br>.....<br>..... |
|-------------------------|
